# Supplementary material for: Evaluating the feasibility of using downwind methods to quantify point source oil and gas emissions using continuously monitoring fence-line sensors
Source: Copernicus journal article supplement (doi:10.5194/amt-18-5687-2025), 2025-10-22
Supplement: Supplementary file 1 [file Unmarked_Supplementary Material.pdf › Supplementary Information/Unmarked_Supplementary Material.pdf]

**S1: Atmospheric Conditions during the Test Period**

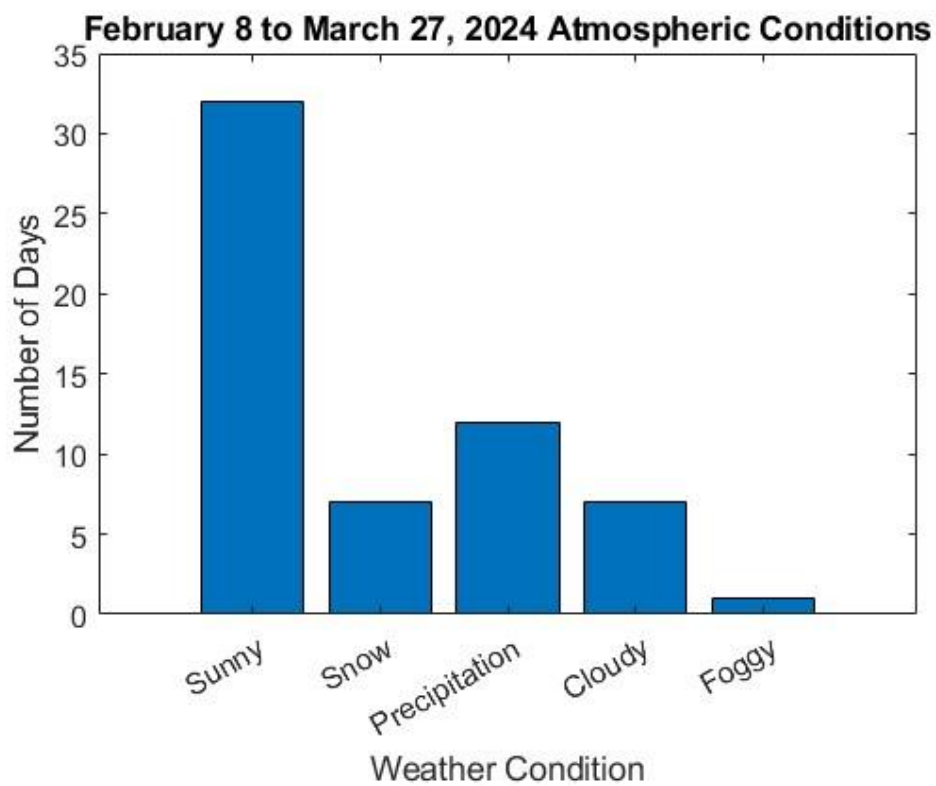

Figure S1. A bar plot of weather conditions during the test period

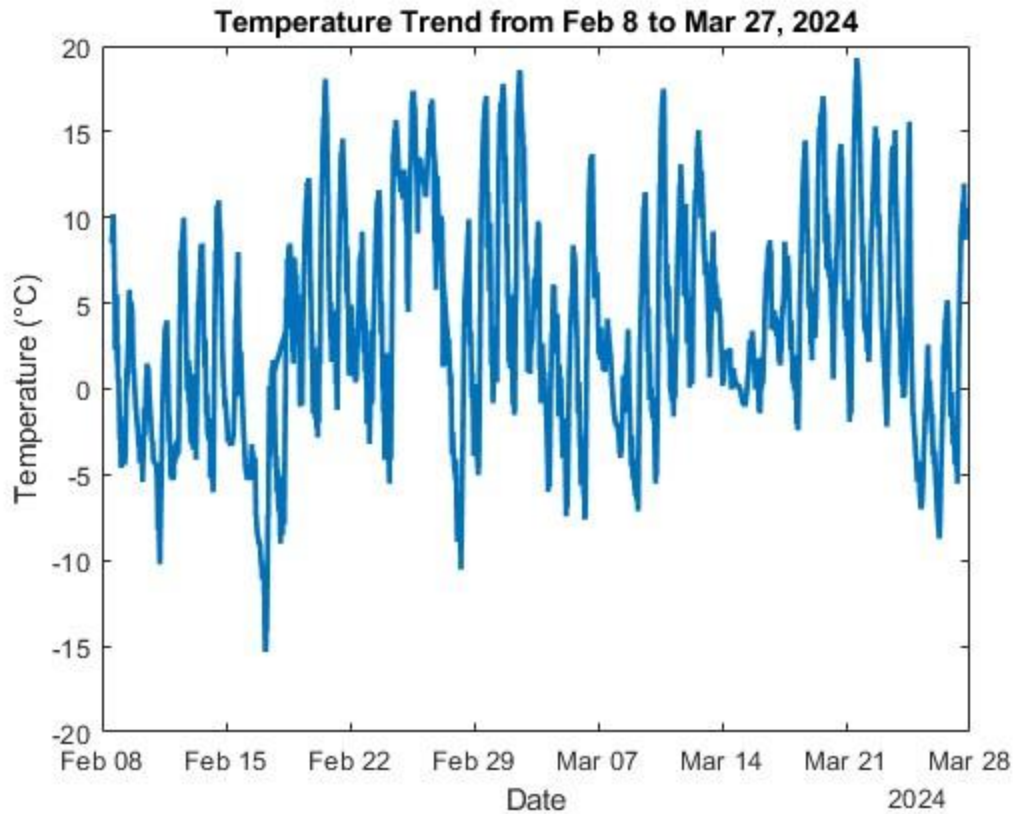

Figure S2. A plot of temperature during the test period

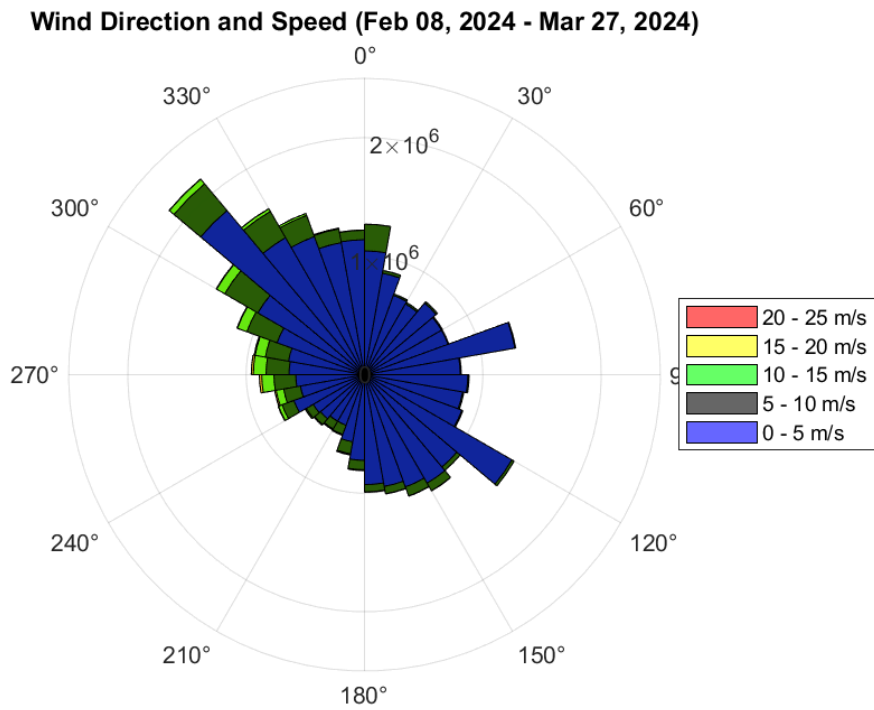

Figure S3. A wind rose plot of wind direction and wind speed during the test period

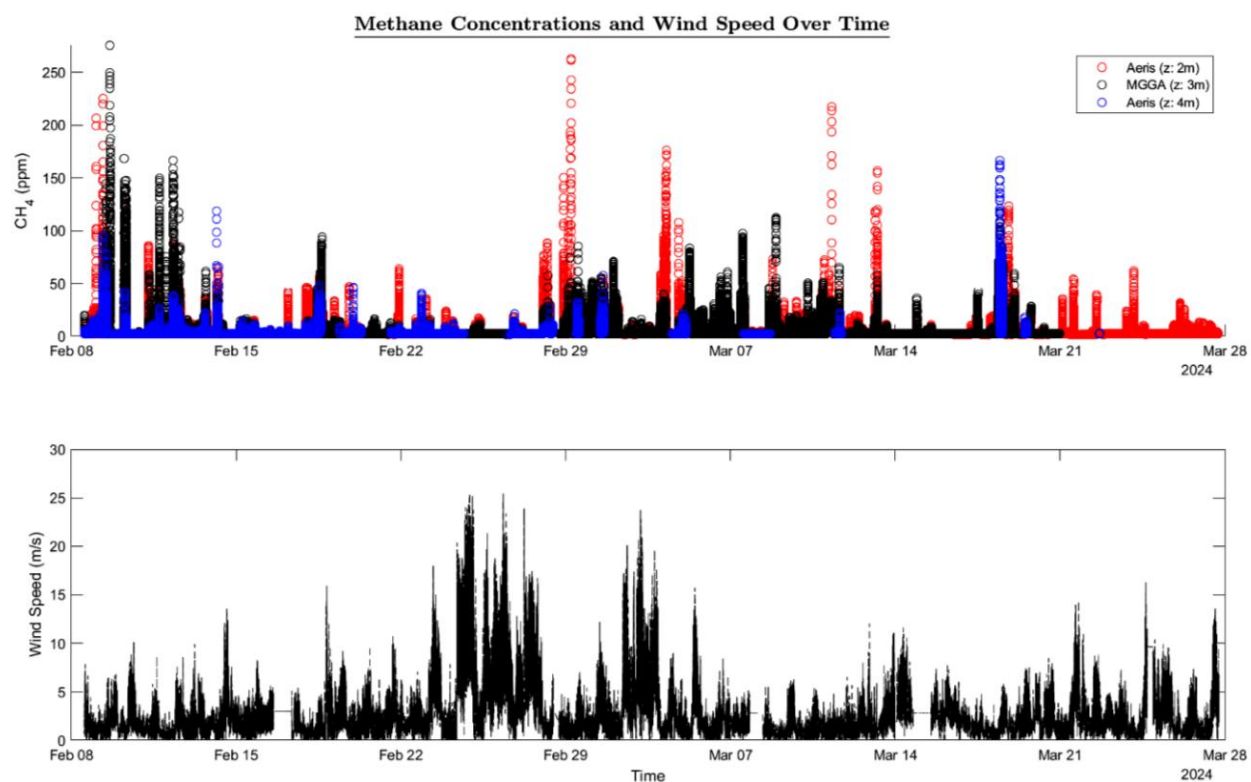

Figure S4. Top plot: A time series plot of  $\text{CH}_4$  concentrations during the test period. Bottom plot: A time series of wind speed during the test period

### S2.1: Equations

$$z_0 = z * \exp\left(-\frac{0.4U}{u_*}\right) \quad (S1)$$

$$u_* = \left[ \left( \overline{u'w'} \right)^2 + \left( \overline{v'w'} \right)^2 \right]^{1/4} \quad (S2)$$

Where  $z_0$  = roughness length (m)

$z$  = measurement height (m)

$U$  = mean wind speed (m/s)

$u_*$  = surface friction velocity (m/s)

$u$  and  $v$  = horizontal wind speeds (m/s)

$w$  = vertical wind speed (m/s)

$L$  was calculated from the surface friction velocity ( $u_*$ , m s<sup>-1</sup>), mean potential temperature ( $\theta$ , K), von Kármán's constant ( $k$ , 0.41), gravitational acceleration ( $g$ , 9.8 m s<sup>-2</sup>) and the surface (kinematic) turbulent flux of sensible heat  $w'\theta'$  (Equation 3) (Kljun et al., 2015; Stull, 1988).

$$L = -\frac{u_*^3 \theta}{k_v g w' \theta'} \quad (S3)$$

The wind direction ( $WD$ ) and speed ( $WS$ ) were calculated from the wind vectors  $u$  and  $v$ , based on the manufacturer's configuration:  $+u$  values = wind from the east,  $+v$  values = wind from the north, and  $+w$  = updraft (Equations 4 and 5).

$$WD = \text{mod}(90 - \text{atan2d}(v, u), 360) \quad (S4)$$

$$WS = \sqrt{u^2 + v^2} \quad (S5)$$

$$F = \frac{u_* k_v (c_2 - c_1)}{\ln\left(\frac{z_2}{z_1}\right) - \Psi_{c,2} + \Psi_{c,1}} \quad (S6)$$

$$Q = \frac{\text{mean}_{\text{Enh}}(x, y, x) * 2\pi\sigma_y\sigma_z U}{\exp\left(-\frac{y^2}{2\sigma_y^2}\right) * \left( \exp\left(-\frac{(z-H)^2}{2\sigma_z^2}\right) + \exp\left(-\frac{(z+H)^2}{2\sigma_z^2}\right) \right)} \quad (S7)$$

$$Q = \frac{\text{mean}_{\text{Enh}}(x, y, x) * 2\pi\sigma_y\sigma_z U}{\exp\left(-\frac{y^2}{2\sigma_y^2}\right) * \left( \exp\left(-\frac{(z-H)^2}{2\sigma_z^2}\right) + \exp\left(-\frac{(z+H)^2}{2\sigma_z^2}\right) + \exp\left(-\frac{(z-2h+H)^2}{2\sigma_z^2}\right) + \exp\left(-\frac{(z+2h-H)^2}{2\sigma_z^2}\right) + \exp\left(-\frac{(z-2h-H)^2}{2\sigma_z^2}\right) \right)} \quad (S8)$$

Where

$Q$  = point source emission rate ( $\text{kg h}^{-1}$ )

$\text{mean}_{\text{Enh}}(x,y,z)$  = mean  $\text{CH}_4$  enhancement at the measurement point (ppm)

$\sigma_y$  (m) = horizontal dispersion coefficient calculated as  $\sigma_v(x/U)$  :  $\sigma_v$  is the standard deviation of  $v$  wind speed from the sonic anemometer,  $x$  is the downwind distance from the point source and  $U$  is the mean wind speed

$\sigma_z$  (m) = vertical dispersion coefficient calculated as  $\sigma_w(x/U)$  :  $\sigma_w$  is the standard deviation of  $w$  wind speed from the sonic anemometer,  $x$  is the downwind distance from the point source and  $U$  is the mean wind speed

$y$  (m) = mean cross wind distance in the averaged period

$z$  (m) = measurement height

$h$  (m) = height of boundary layer: estimated based on Kljun et al. (2015)

$H$  (m) = point source height

## S2.2: Instrument Sampling Frequency

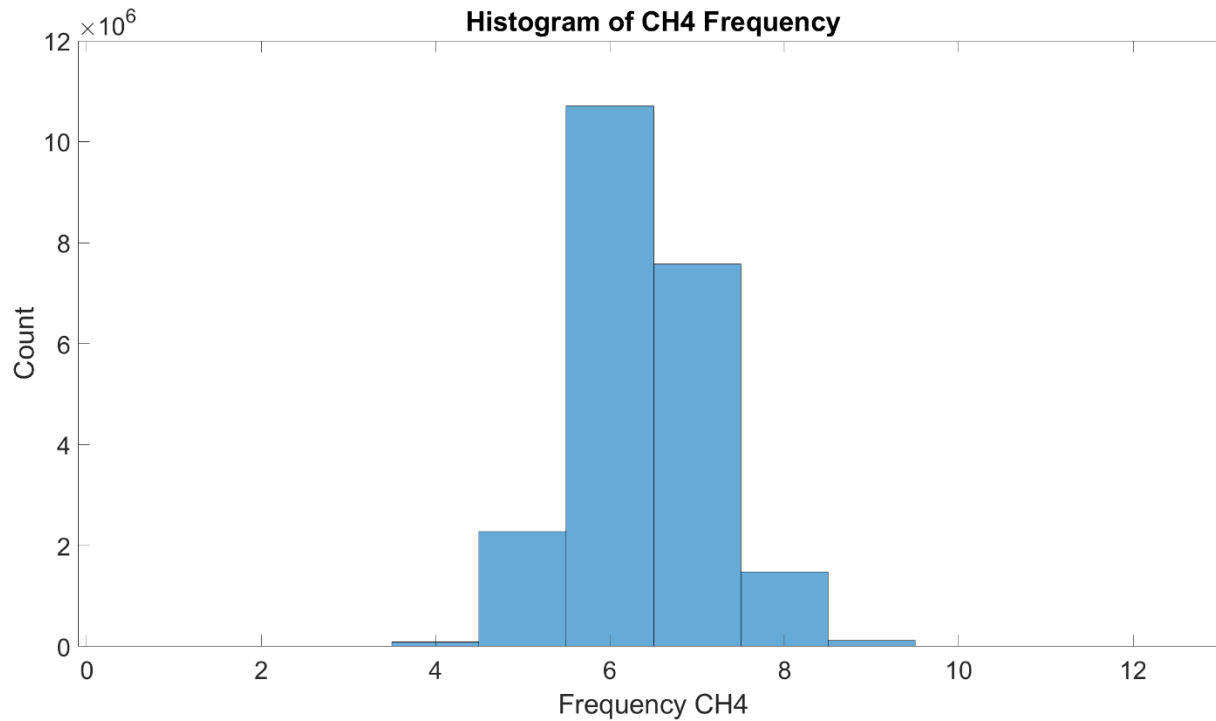

Figure S5. A histogram of CH<sub>4</sub> sampling frequency by the MGGA

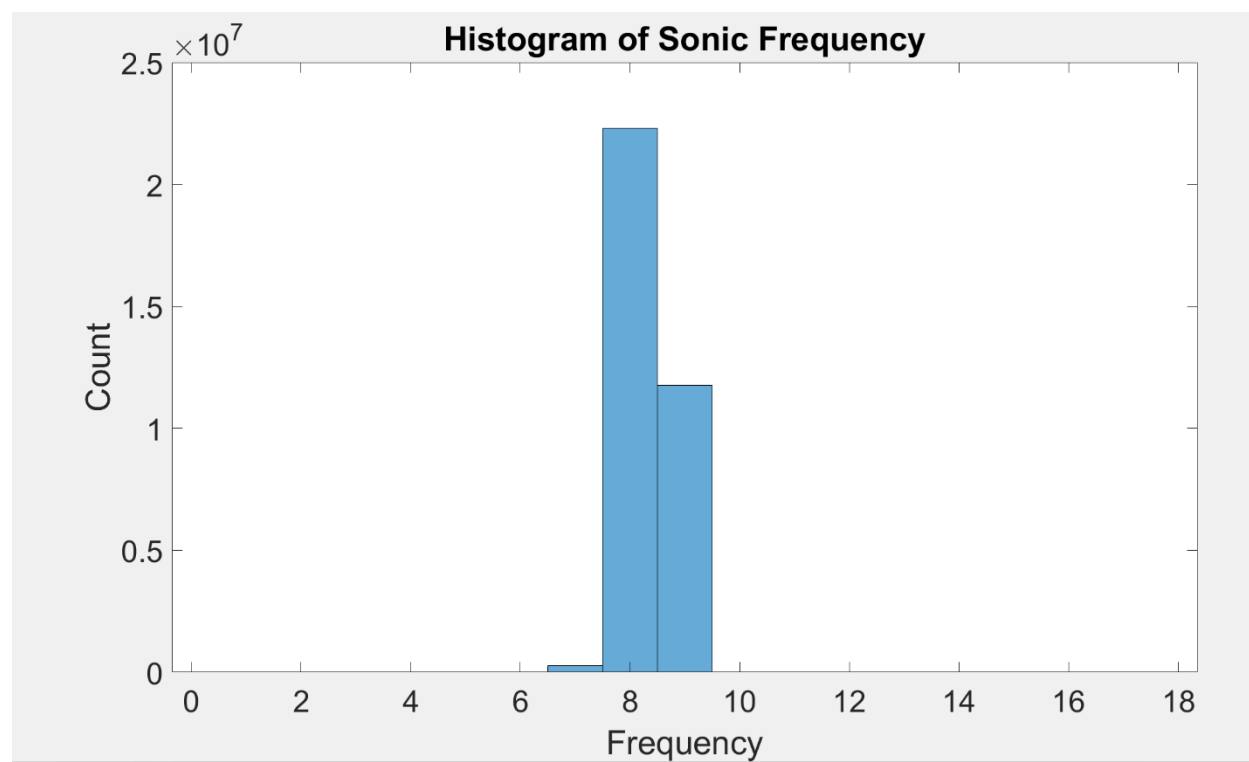

Figure S6. A histogram of sonic anemometer sampling frequency

## S2.3 Cospectra/ogive/u\*/stationarity

### S2.3.1 Cospectra analysis

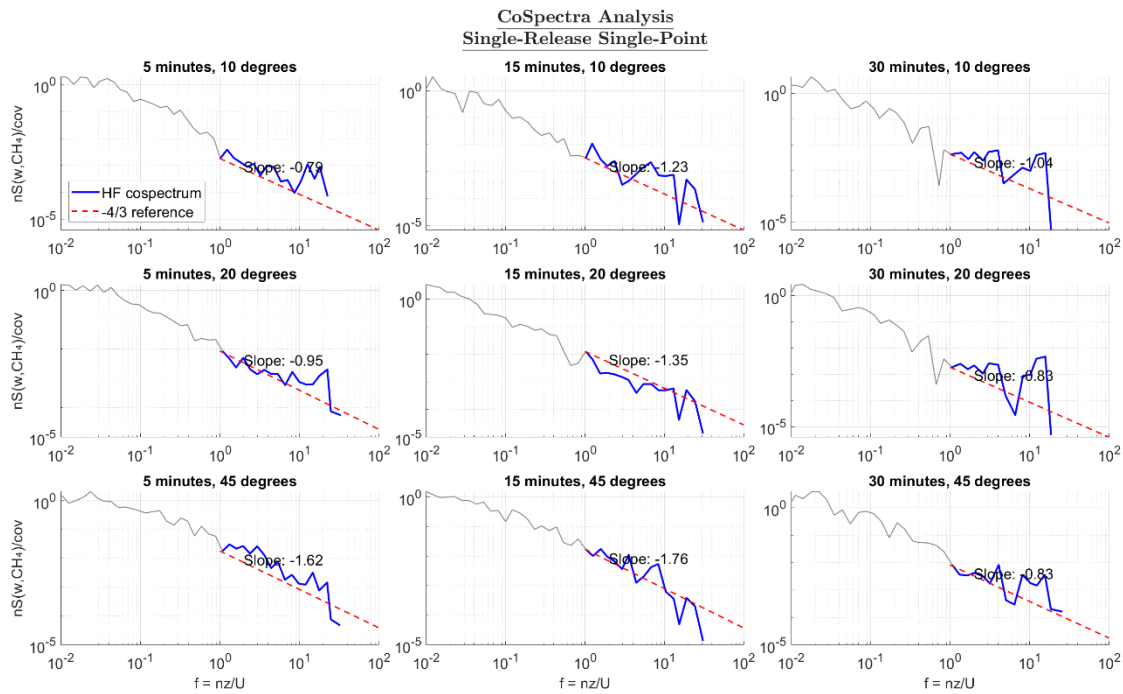

Figure S7. CoSpectra analysis for the eddy covariance fluxes for single release single point emissions

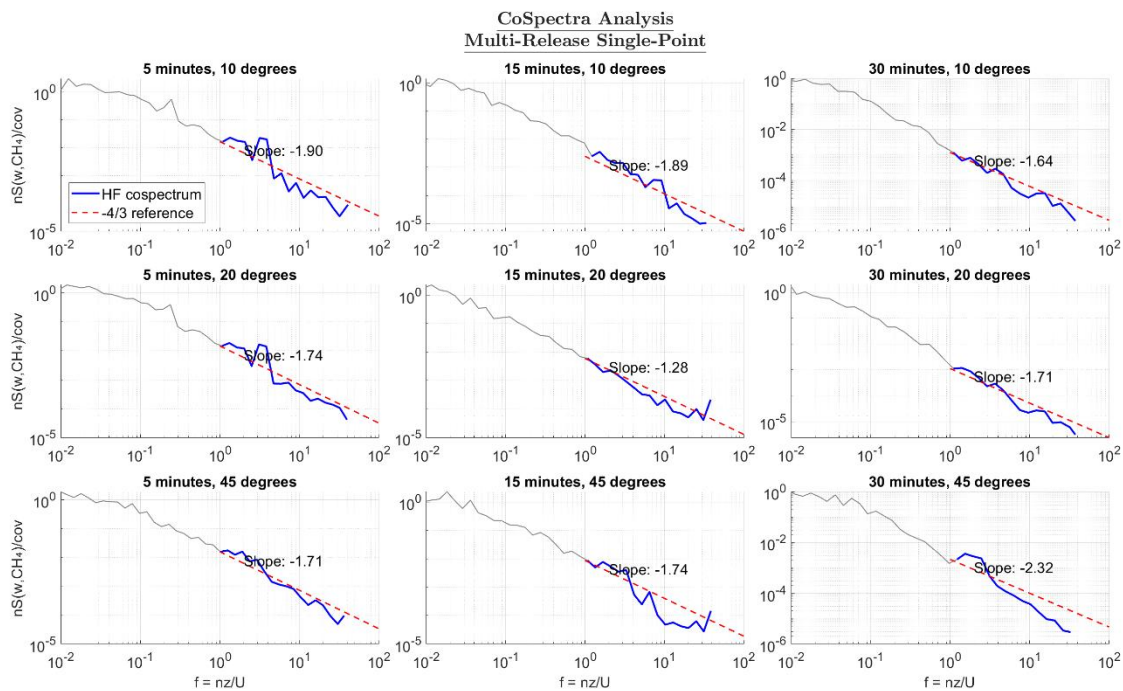

Figure S8. CoSpectra analysis for the eddy covariance fluxes for multi release single point emissions

### S2.3.2 CH<sub>4</sub> Flux vs u\*

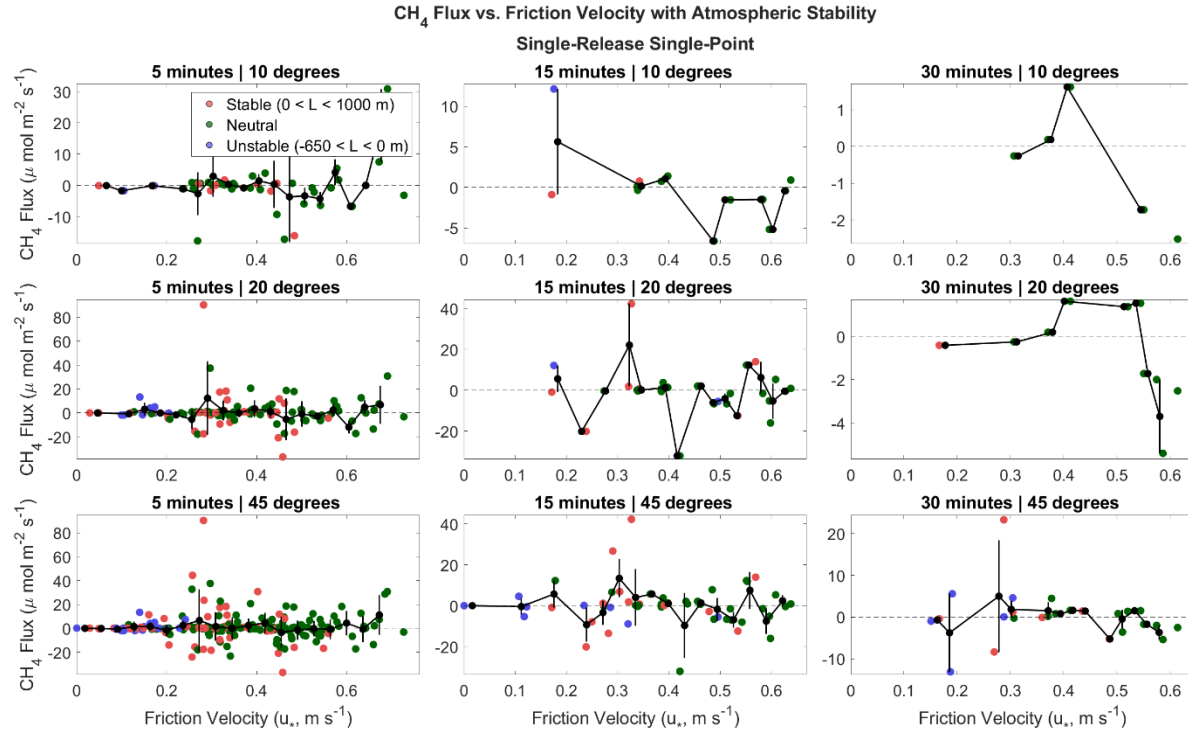

Figure S9. A plot of CH<sub>4</sub> flux vs friction velocity for the eddy covariance fluxes for single release single point emissions

# CH<sub>4</sub> Flux vs. Friction Velocity with Atmospheric Stability

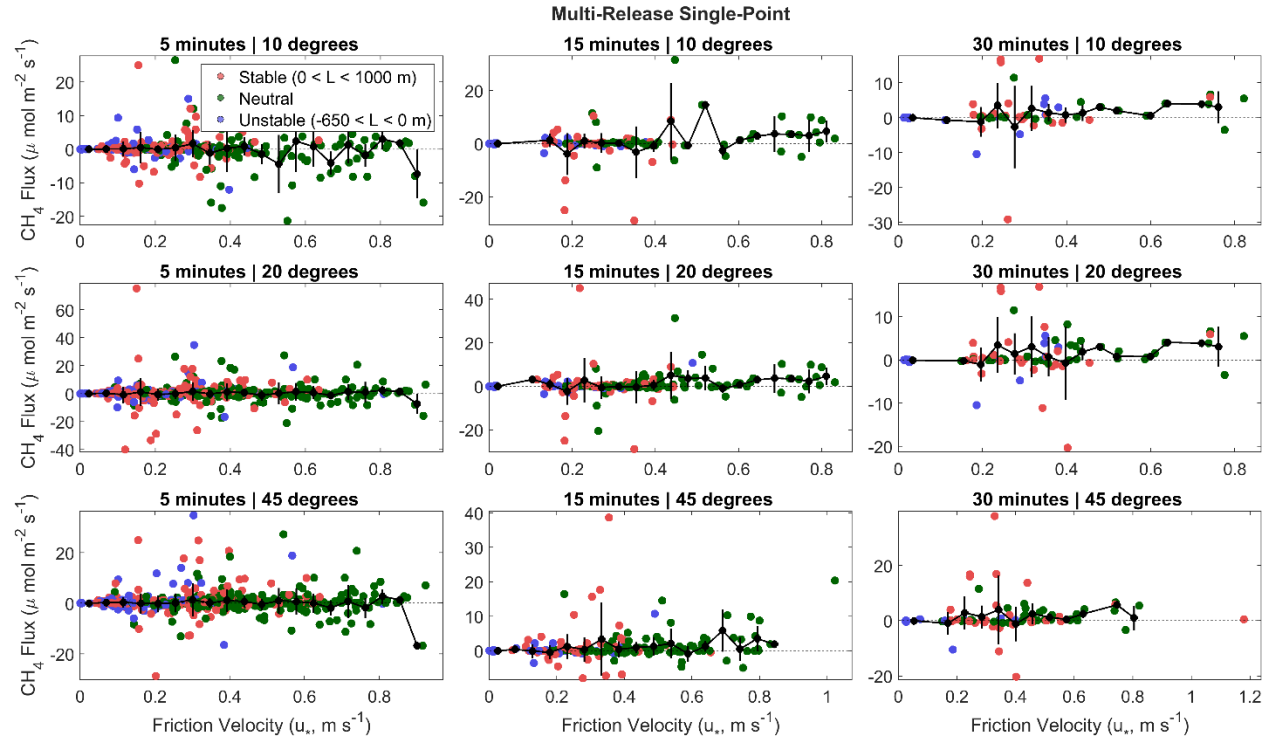

Figure S10. A plot of CH<sub>4</sub> flux vs friction velocity for the eddy covariance fluxes for multi release single point emissions

### S2.3.3 Ogive Analysis

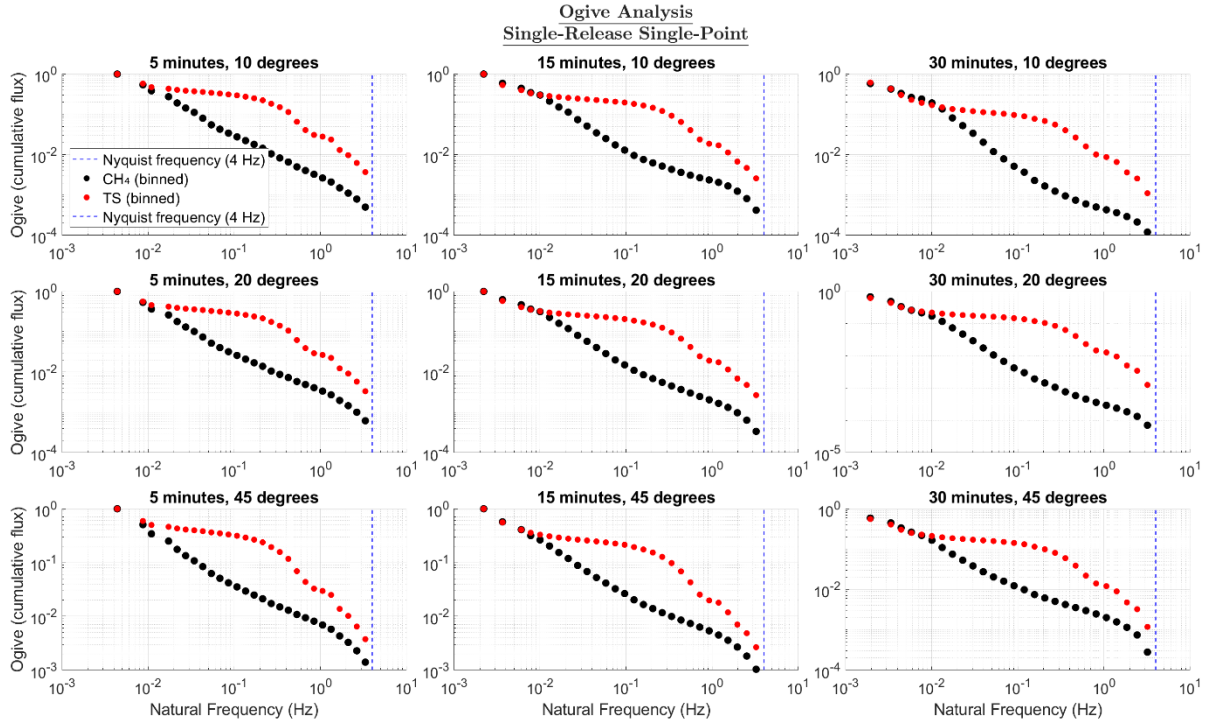

Figure S11. Ogive analysis for the eddy covariance fluxes for single release single point emissions

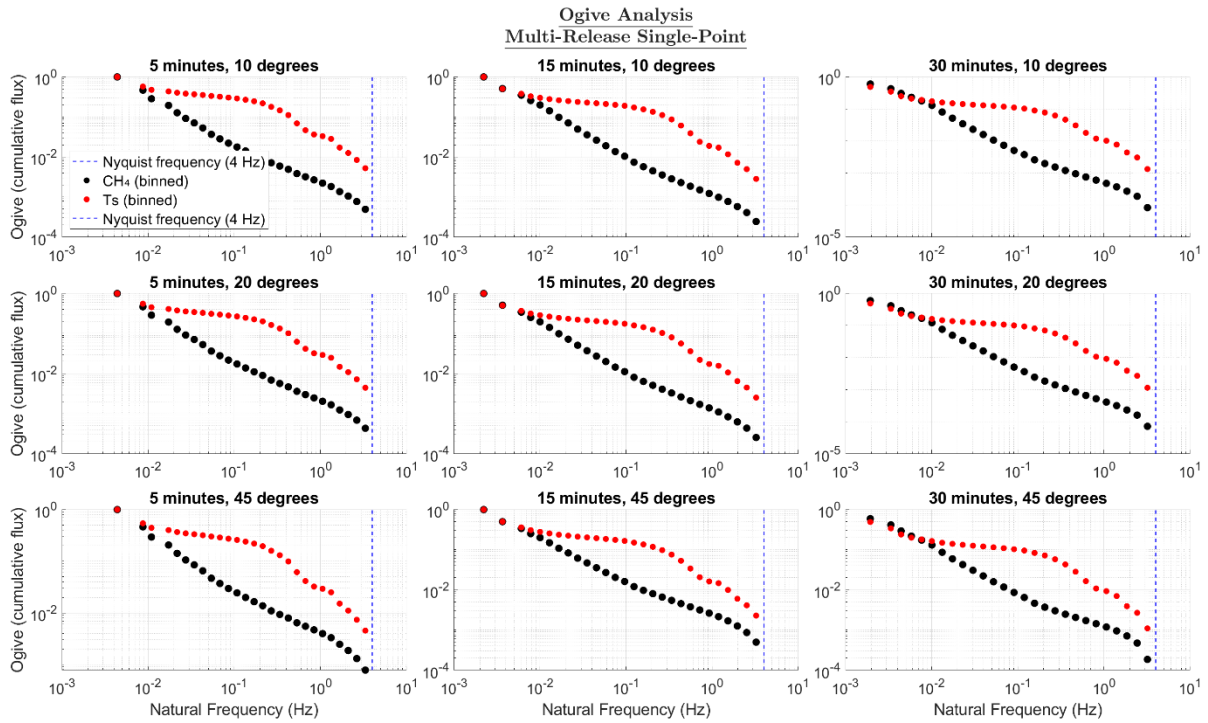

Figure S12. Ogive analysis for the eddy covariance fluxes for Multi release single point emissions

### S2.3.4 Stationarity Plot

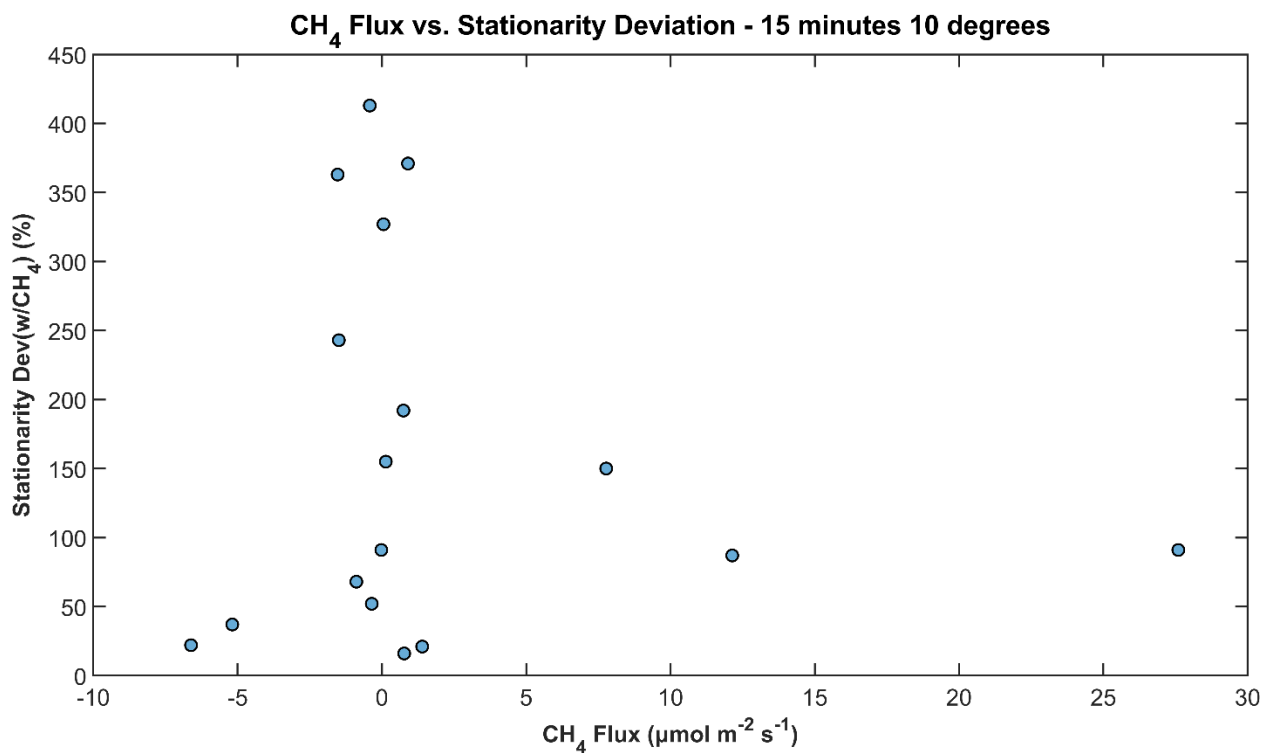

Figure S13. A sample plot of CH<sub>4</sub> flux vs stationarity deviation for the eddy covariance fluxes-15 minutes 10 degrees wind sector

### S3: Results

#### S3.1 Eddy Covariance

##### S3.1.1 Single Release Single Point

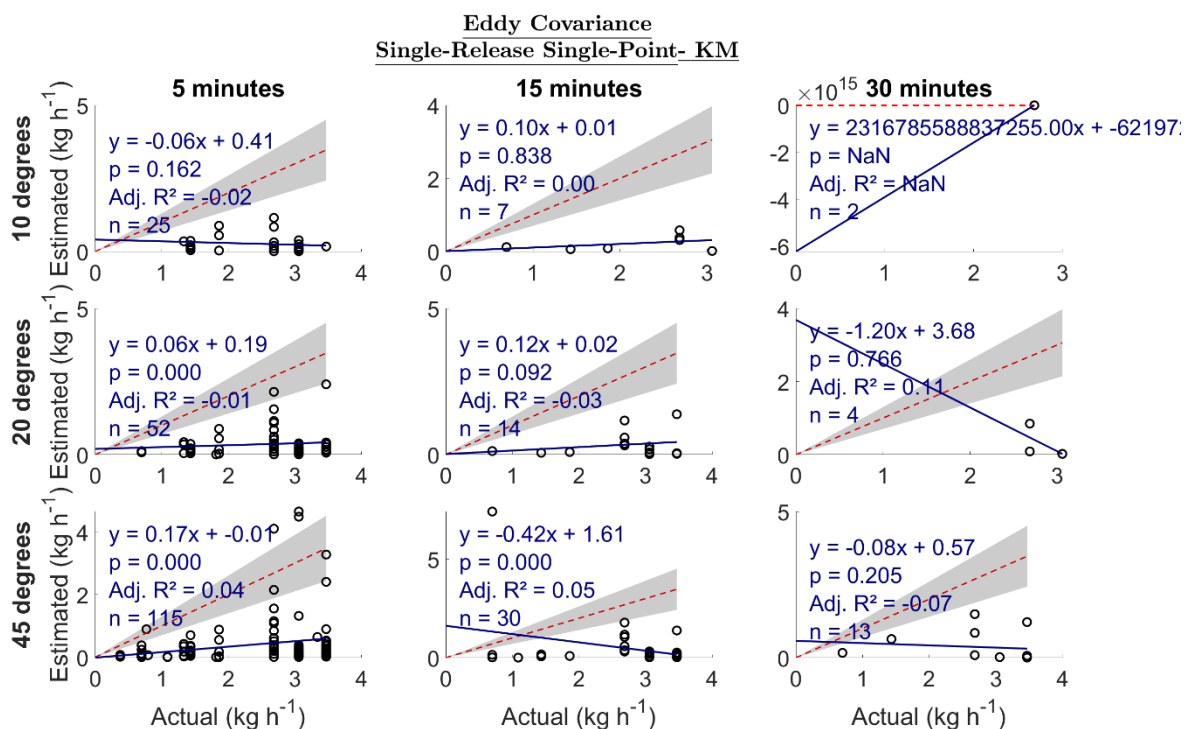

Figure S14. Estimated emission vs actual emission ( $\text{kg h}^{-1}$ ) for single-release single-point emissions. The red dotted line is a 1:1 line based on actual emissions i.e. points below the line are underestimated and above are overestimated emissions. The gray region represents  $\pm 30\%$  of the actual emission. Adj.  $R^2$  is the adjusted  $R^2$ . The sample size is n.

### S3.1.2 Multi-Release Single-Point

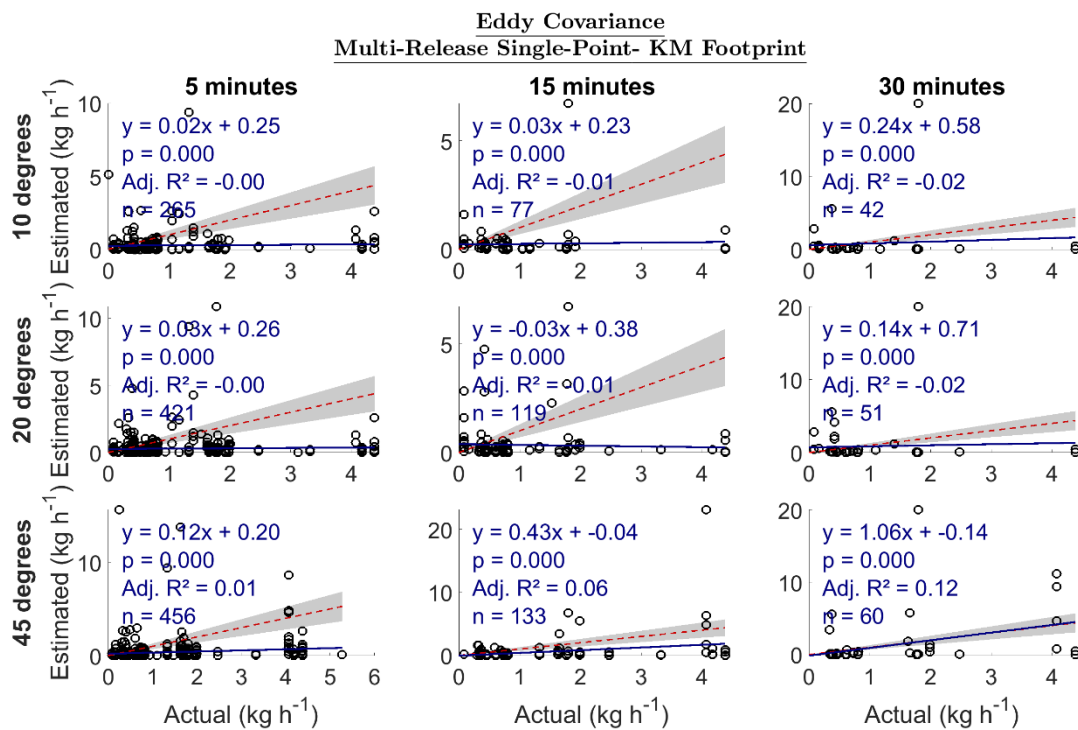

Figure S15. Estimated emission vs actual emission ( $\text{kg h}^{-1}$ ) for multi-release single-point emissions. The red dotted line is a 1:1 line based on actual emissions i.e. points below the line are underestimated and above are overestimated emissions. The gray region represents  $\pm 30\%$  of the actual emission. Adj.  $R^2$  is the adjusted  $R^2$ . The sample size is n.

### S3.2 Gaussian Plume Inverse Method: Single-Release Single-Point

#### S3.2.1 Scenario 1: Equation S7 & ~10 Hz sonic anemometer dispersion coefficients

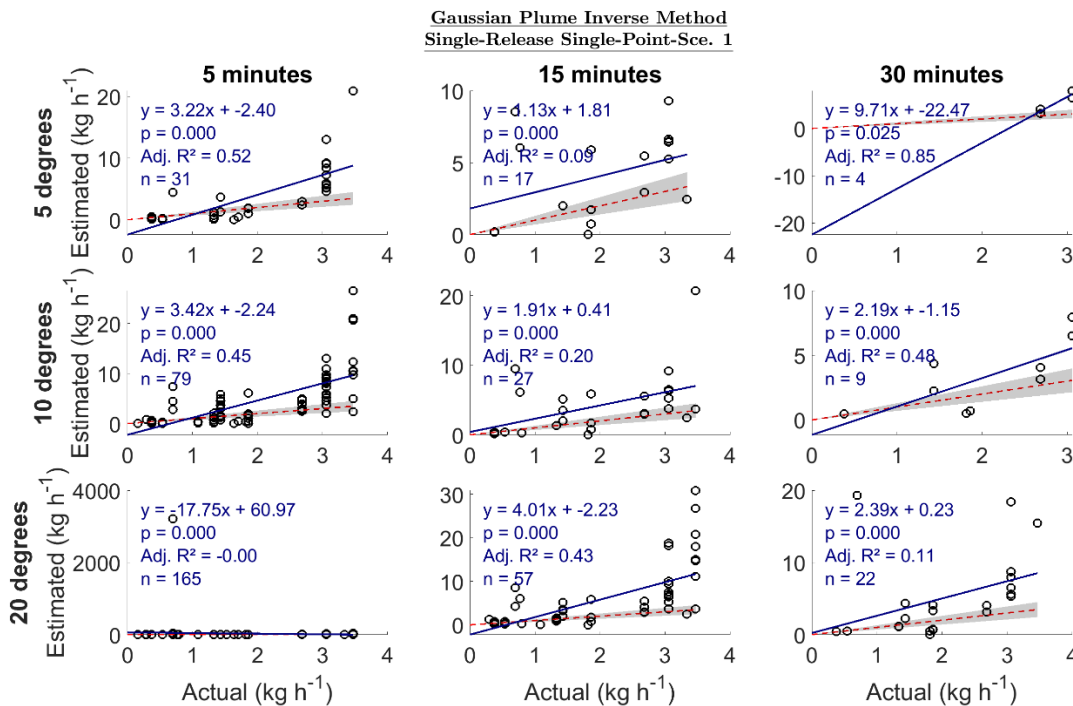

Figure S16. Estimated emission vs actual emission ( $\text{kg h}^{-1}$ ) for single-release single-point emissions. The red dotted line is a 1:1 line based on actual emissions i.e. points below the line are underestimated and above are overestimated emissions. The gray region represents  $\pm 30\%$  of the actual emission. Adj.  $R^2$  is the adjusted  $R^2$ . The sample size is n.

### S3.2.2 Scenario 2: Equation S8 & ~10 Hz sonic anemometer dispersion coefficients

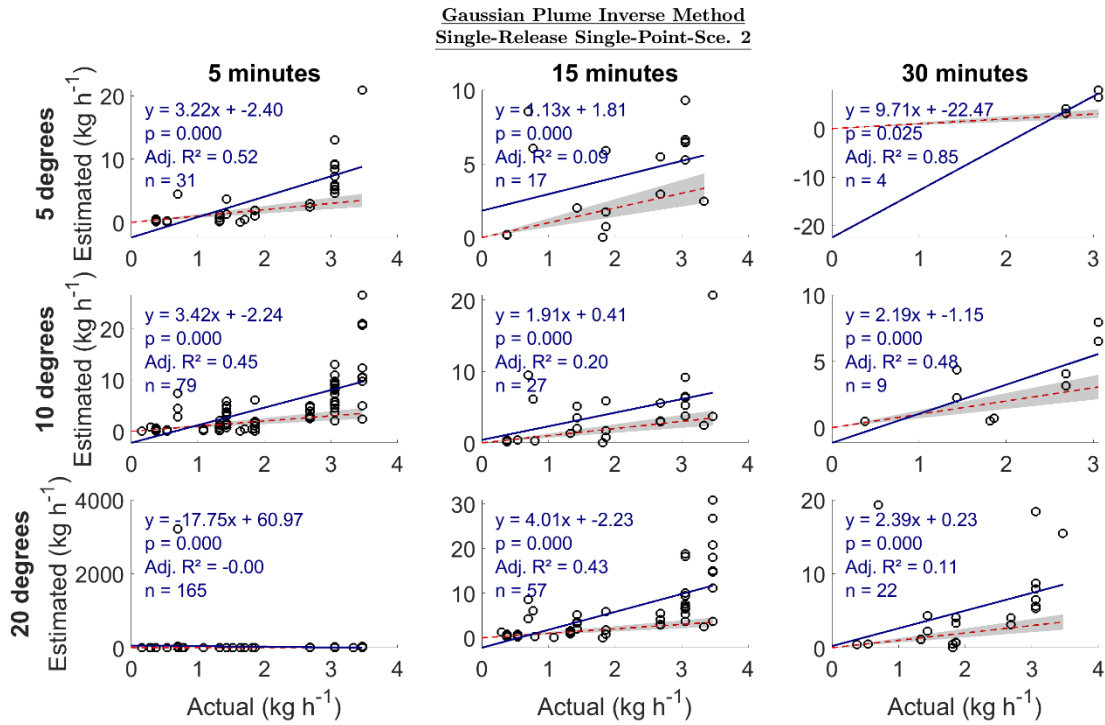

Figure S17. Estimated emission vs actual emission ( $\text{kg h}^{-1}$ ) for single-release single-point emissions. The red dotted line is a 1:1 line based on actual emissions i.e. points below the line are underestimated and above are overestimated emissions. The gray region represents  $\pm 30\%$  of the actual emission. Adj.  $R^2$  is the adjusted  $R^2$ . The sample size is n.

### S3.2.3 Scenario 3: Equation S7 & EPA 2013 dispersion coefficients

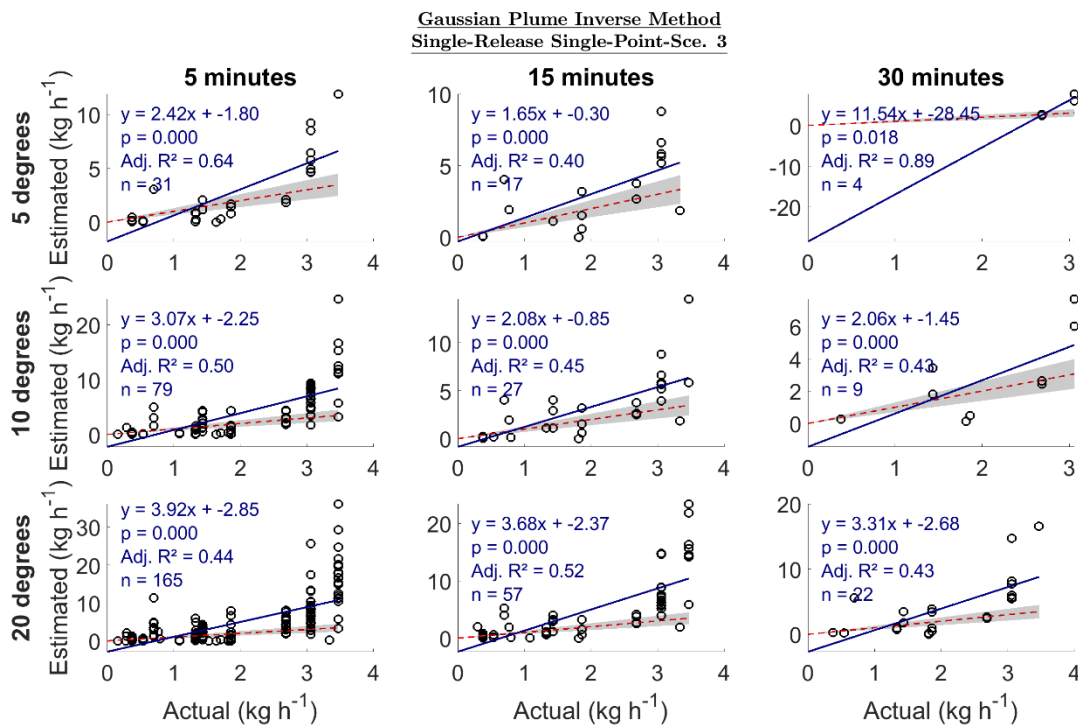

Figure S18. Estimated emission vs actual emission ( $\text{kg h}^{-1}$ ) for single-release single-point emissions. The red dotted line is a 1:1 line based on actual emissions i.e. points below the line are underestimated and above are overestimated emissions. The gray region represents  $\pm 30\%$  of the actual emission. Adj.  $R^2$  is the adjusted  $R^2$ . The sample size is n.

### S3.2.4 Scenario 4: Equation S8 & EPA 2013 dispersion coefficients

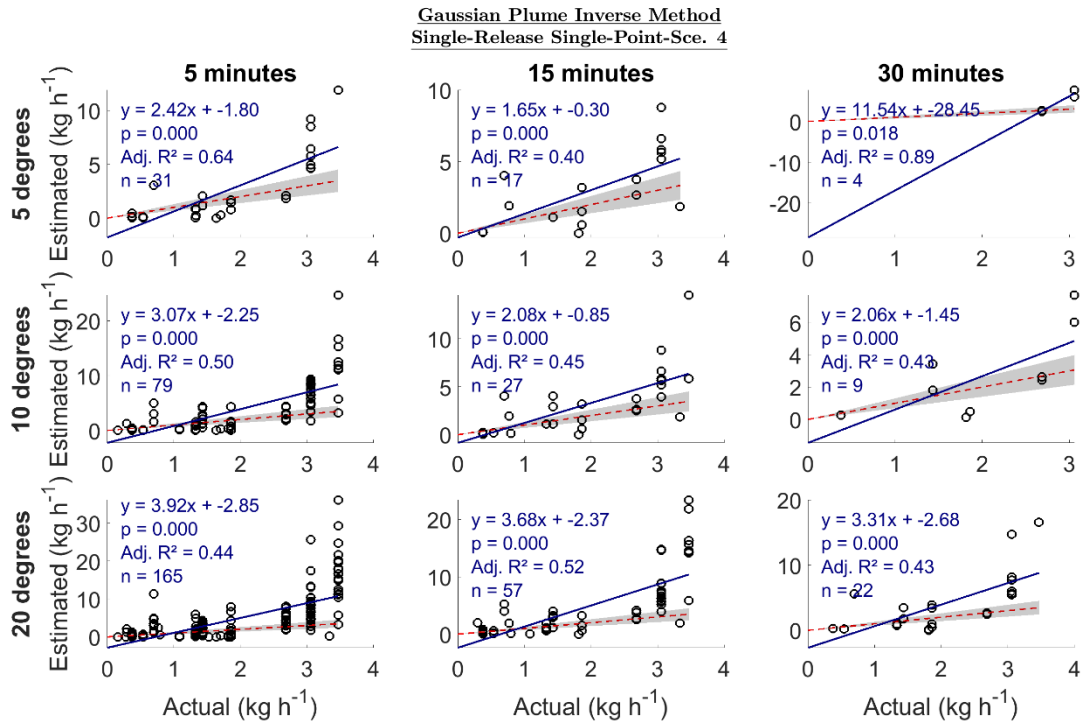

Figure S19. Estimated emission vs actual emission ( $\text{kg h}^{-1}$ ) for single-release single-point emissions. The red dotted line is a 1:1 line based on actual emissions i.e. points below the line are underestimated and above are overestimated emissions. The gray region represents  $\pm 30\%$  of the actual emission. Adj. R<sup>2</sup> is the adjusted R<sup>2</sup>. The sample size is n.

### S3.2.5 Scenario 5: Equation S7 & 1 Hz sonic anemometer dispersion coefficients

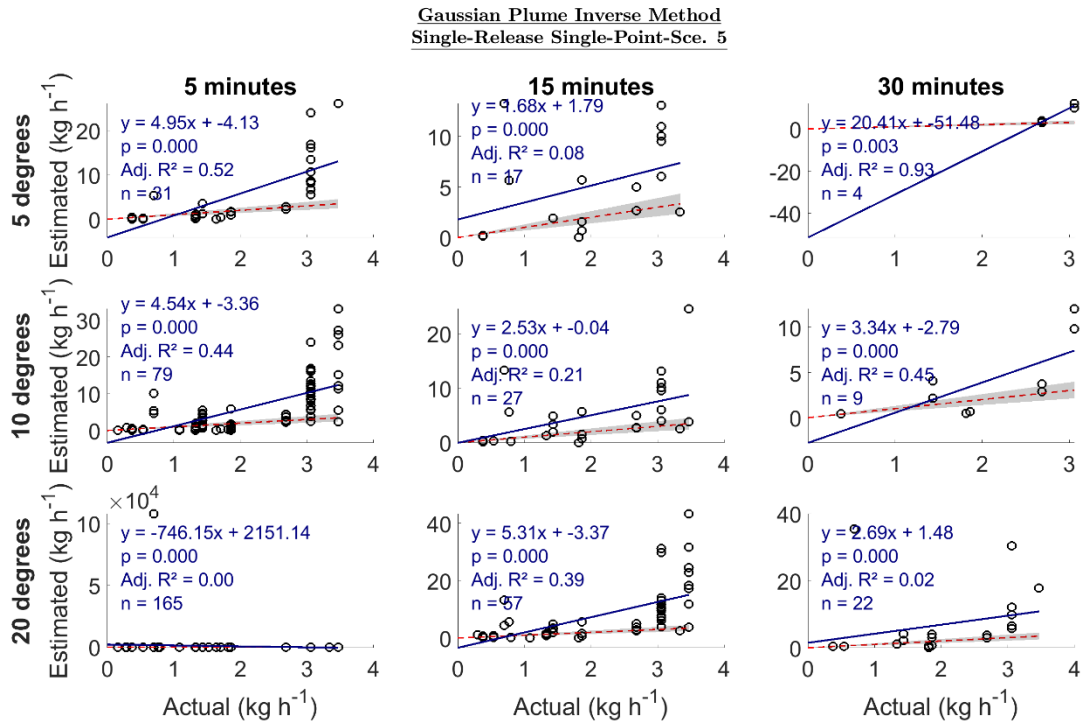

Figure S20. Estimated emission vs actual emission ( $\text{kg h}^{-1}$ ) for single-release single-point emissions. The red dotted line is a 1:1 line based on actual emissions i.e. points below the line are underestimated and above are overestimated emissions. The gray region represents  $\pm 30\%$  of the actual emission. Adj.  $R^2$  is the adjusted  $R^2$ . The sample size is n.

### S3.2.6 Scenario 6: Equation S8 & 1 Hz sonic anemometer dispersion coefficients

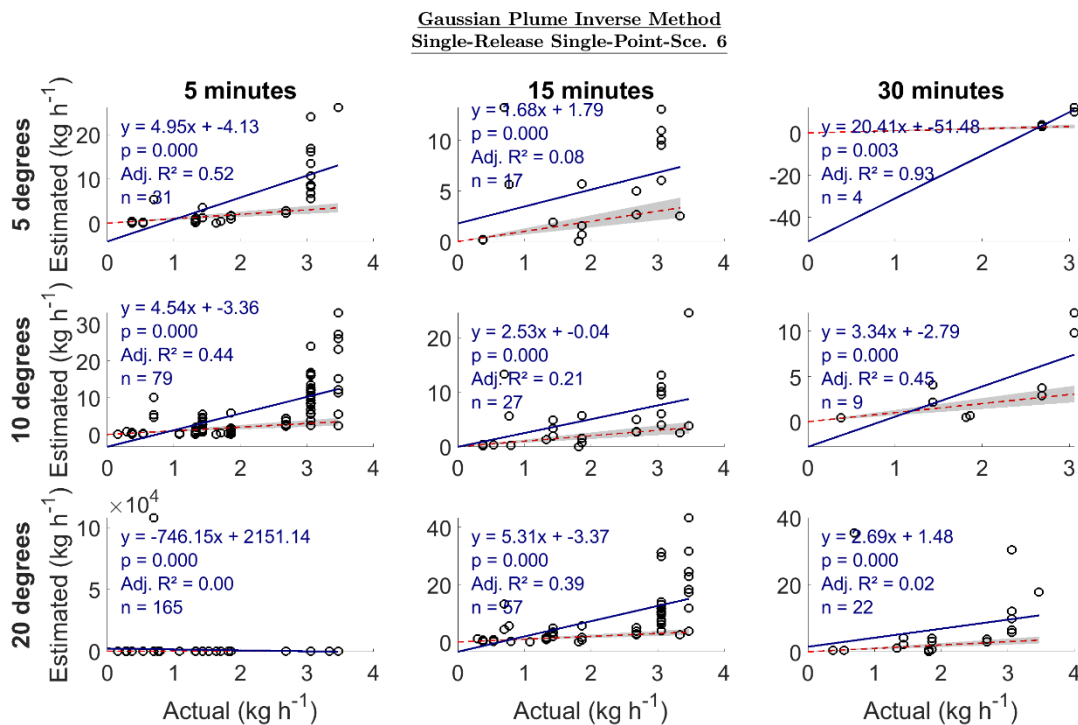

Figure S21. Estimated emission vs actual emission ( $\text{kg h}^{-1}$ ) for single-release single-point emissions. The red dotted line is a 1:1 line based on actual emissions i.e. points below the line are underestimated and above are overestimated emissions. The gray region represents  $\pm 30\%$  of the actual emission. Adj.  $R^2$  is the adjusted  $R^2$ . The sample size is n.
