# Supplementary material for: Evaluating the feasibility of using downwind methods to quantify point source oil and gas emissions using continuously monitoring fence-line sensors
Source: Copernicus journal article supplement (doi:10.5194/amt-18-5687-2025), 2025-10-22
Supplement: Supplementary file 1 [file Validation.xlsx]

## Sheet: Sheet1
Time	timestamp	AT	BP	RH	U	V	W	WS	WD	Time_MGGA_second_avg	x_CH4__ppm	MGGA_lat_N	MGGA_long_W	EventID	UTCStart	UTCEnd	Duration_HMS	EmissionPoint	C1FlowAvg_slpm	Description	Lat	Lon	Alt	MTStart	MTEnd	Distance_meters	CountUniquePoints	Actual_Emission_kg_h	TotalEmissions	bearing	V1	U1	V2	W1	WS_rotated	wTp	Uast	L	sigma_y	sigma_z	avg_WD	downwind	diff	hs	Cb	mean_CH4_ppm	z	z0	meanAT
2024-02-13 10:15:00	1707844510	277.737	841.288	44.5977	1.61913	-0.272489	0.747966	1.64424	99.3451	2024-02-13 10:15:00	3.1836	40.596	-105.14	20240213_0000_007	2024-02-13 17:00:00	2024-02-13 19:00:00	01:59:59	4T-12	67.102	Thief Hatch	40.5958	-105.14	1552.6	2024-02-13 10:00:00	2024-02-13 12:00:00	46.5081	1	2.64094	2.64094	310.548	-1.43695	0.794347	-1.51495	0.573778	1.71057	0.00401009	0.602905	-3967.79	1.02895	0.29844	129.054	130.548	1.49411	4.572	2.09009	3.04429	3	0.280704	277.935
2024-02-13 11:00:00	1707847211	277.943	841.321	41.6551	3.19105	-2.54413	0.0866926	4.08508	128.657	2024-02-13 11:00:00	6.42767	40.596	-105.14	20240213_0000_007	2024-02-13 17:00:00	2024-02-13 19:00:00	01:59:59	4T-12	67.102	Thief Hatch	40.5958	-105.14	1552.6	2024-02-13 10:00:00	2024-02-13 12:00:00	46.5081	1	2.64094	2.64094	310.548	-4.0786	-0.143073	-4.06164	-0.381511	4.06416	0.00189963	0.618549	-9046.79	0.890296	0.321797	126.946	130.548	3.60143	4.572	2.09009	3.97083	3	0.395957	277.99
2024-02-13 11:15:00	1707848111	278.139	841.153	41.3956	2.24091	-2.44422	0.272063	3.31775	137.554	2024-02-13 11:15:00	3.06104	40.596	-105.14	20240213_0000_007	2024-02-13 17:00:00	2024-02-13 19:00:00	01:59:59	4T-12	67.102	Thief Hatch	40.5958	-105.14	1552.6	2024-02-13 10:00:00	2024-02-13 12:00:00	46.5081	1	2.64094	2.64094	310.548	-3.3153	0.0684753	-3.32043	-0.19989	3.32114	-0.00645401	0.572507	2114.67	0.869971	0.275331	138.43	130.548	7.88279	4.572	2.09009	3.10287	3	0.442707	278.413
2024-02-15 07:00:00	1708005624	269.941	841.622	90.5686	0.424906	-0.676808	0.207597	0.808437	147.425	2024-02-15 07:00:00	2.35306	40.596	-105.14	20240215_0000_002	2024-02-15 11:00:00	2024-02-15 15:00:00	03:59:59	4T-31	33.256	Header	40.5958	-105.14	1553.2	2024-02-15 04:00:00	2024-02-15 08:00:00	47.857	1	1.30886	1.30886	298.556	-0.636258	-0.483518	-0.667892	0.0429034	0.824542	-0.000712341	0.410045	6824.37	0.380261	0.102595	111.865	118.556	6.69083	4.9276	2.06483	3.07817	3	0.982543	269.945
2024-02-17 09:30:00	1708187437	266.936	849.385	61.7801	-0.0972851	0.263648	0.360186	0.281456	339.81	2024-02-17 09:30:00	2.0343	40.596	-105.14	20240217_0000_004	2024-02-17 16:00:00	2024-02-17 20:00:00	03:59:59	5S-27	45.407	Kimray Packing	40.5959	-105.139	1548.3	2024-02-17 09:00:00	2024-02-17 13:00:00	80.2041	1	1.78709	1.78709	278.871	0.189992	0.207069	-0.293404	0.282392	0.359115	-0.115835	0.365114	29.3235	0.19487	0.112978	97.069	98.8712	1.80223	1.2192	2.031	2.03516	3	2.18684	267.879
2024-02-18 18:15:00	1708305346	276.136	836.131	52.4533	-0.754041	-0.36188	0.233699	0.836384	244.351	2024-02-18 18:15:00	2.59248	40.596	-105.14	20240219_0000_000	2024-02-19	2024-02-19 02:00:00	01:59:58	4S-21	19.211	Kimray valve packing	40.5957	-105.14	1549.1	2024-02-18 17:00:00	2024-02-18 19:00:00	41.5494	1	0.75609	0.75609	353.459	0.337575	-0.765231	0.343862	-0.224345	0.838939	0.1973	1.18825	-614.202	2.13086	0.143268	174.738	173.459	1.27925	1.143	2.21992	3.78377	3	1.62303	276.019
2024-02-24 05:08:00	1708776525	268.836	841.7	55.6761	0.571093	0.657485	0.246411	0.870881	40.9777	2024-02-24 05:08:00	2.10247	40.596	-105.14	20240224_0000_009	2024-02-24 12:08:00	2024-02-24 14:08:00	01:59:59	4S-22	19.849	Kimray Flange Diaphragm	40.5957	-105.14	1549.2	2024-02-24 05:08:00	2024-02-24 07:08:00	41.8099	1	0.7812	0.7812	353.034	0.861553	0.127125	0.624793	0.642358	0.637595	0.140774	0.821323	-275.886	0.715648	0.0999016	181.062	173.034	8.02846	1.143	2.10249	2.2837	3	1.75439	268.382
2024-03-01 10:30:00	1709314231	287.74	836.546	21.7052	2.99005	-2.25186	0.496715	3.75392	126.799	2024-03-01 10:30:00	12.6651	40.596	-105.14	20240301_0000_011	2024-03-01 17:00:00	2024-03-01 22:00:00	04:59:59	4W-22	76.44	Threaded Connection - Pressure Transducer	40.596	-105.14	1548.2	2024-03-01 10:00:00	2024-03-01 15:00:00	10.5212	1	3.00846	3.00846	331.395	-3.35739	1.65505	-3.38833	0.195116	3.77093	-0.0111104	0.744117	2796.2	1.37148	0.430755	153.236	151.395	1.84083	1.4478	2.02018	10.239	3	0.133036	288.17
2024-03-01 10:45:00	1709315130	288.338	836.398	21.2552	4.17904	-4.33136	0.101895	6.0203	136.24	2024-03-01 10:45:00	9.05992	40.596	-105.14	20240301_0000_011	2024-03-01 17:00:00	2024-03-01 22:00:00	04:59:59	4W-22	76.44	Threaded Connection - Pressure Transducer	40.596	-105.14	1548.2	2024-03-01 10:00:00	2024-03-01 15:00:00	10.5212	1	3.00846	3.00846	331.395	-5.68581	1.974	-5.66993	-0.436665	6.00373	-0.00349078	0.735233	8606.02	1.13496	0.382804	155.512	151.395	4.11747	1.4478	2.02018	11.2604	3	0.166712	288.875
2024-03-01 11:00:00	1709316031	289.04	836.359	20.0089	-0.42138	-4.78883	-0.0221275	4.8086	185.05	2024-03-01 11:00:00	16.9775	40.596	-105.14	20240301_0000_011	2024-03-01 17:00:00	2024-03-01 22:00:00	04:59:59	4W-22	76.44	Threaded Connection - Pressure Transducer	40.596	-105.14	1548.2	2024-03-01 10:00:00	2024-03-01 15:00:00	10.5212	1	3.00846	3.00846	331.395	-3.84749	-2.88223	-3.83224	-0.343019	4.79513	-0.00145536	0.72717	19976.3	1.20222	0.409035	148.667	151.395	2.7275	1.4478	2.02018	15.1217	3	0.150161	288.961
2024-03-01 11:15:00	1709316930	288.74	836.41	20.3111	2.42107	-2.57743	0.715403	3.538	136.968	2024-03-01 11:15:00	11.6978	40.596	-105.14	20240301_0000_011	2024-03-01 17:00:00	2024-03-01 22:00:00	04:59:59	4W-22	76.44	Threaded Connection - Pressure Transducer	40.596	-105.14	1548.2	2024-03-01 10:00:00	2024-03-01 15:00:00	10.5212	1	3.00846	3.00846	331.395	-3.41807	0.906356	-3.46607	0.425922	3.58261	-0.00435409	0.672598	5281.27	1.11074	0.39107	151.849	151.395	0.454173	1.4478	2.02018	11.6433	3	0.104016	288.822
2024-03-01 13:45:00	1709325930	289.543	835.221	18.4105	2.97784	-1.11104	0.162378	3.20714	110.068	2024-03-01 13:45:00	5.11286	40.596	-105.14	20240301_0000_011	2024-03-01 17:00:00	2024-03-01 22:00:00	04:59:59	4W-22	76.44	Threaded Connection - Pressure Transducer	40.596	-105.14	1548.2	2024-03-01 10:00:00	2024-03-01 15:00:00	10.5212	1	3.00846	3.00846	331.395	-2.35838	2.13072	-2.36174	-0.102493	3.18084	-0.00489335	0.680827	4893.49	1.14633	0.360643	152.387	151.395	0.992122	1.4478	2.02018	11.359	3	0.287127	289.86
2024-03-01 14:15:00	1709327731	289.942	834.934	18.01	-2.2556	-2.4737	0.0720459	3.34818	222.394	2024-03-01 14:15:00	4.54035	40.596	-105.14	20240301_0000_011	2024-03-01 17:00:00	2024-03-01 22:00:00	04:59:59	4W-22	76.44	Threaded Connection - Pressure Transducer	40.596	-105.14	1548.2	2024-03-01 10:00:00	2024-03-01 15:00:00	10.5212	1	3.00846	3.00846	331.395	-0.457622	-3.31625	-0.463217	0.00620849	3.34844	-0.00618095	0.791826	6098.83	1.21026	0.334179	142.205	151.395	9.18997	1.4478	2.02018	8.13893	3	0.570479	290.041
2024-03-06 14:15:00	1709759712	285.743	833.48	26.5843	-0.346657	-0.819845	0.245793	0.890122	202.92	2024-03-06 14:15:00	2.19783	40.596	-105.14	20240306_0000_008	2024-03-06 19:00:00	2024-03-06 22:00:00	03:00:00	4W-32	83.42	Flange - Plunger Base	40.5959	-105.14	1549.1	2024-03-06 12:00:00	2024-03-06 15:00:00	9.96453	1	3.28317	3.28317	352.767	0.262438	-0.850554	0.340686	-0.114983	0.916248	-0.0253234	0.747401	1234.41	0.742369	0.161382	171.03	172.767	1.73611	0.9652	2.07032	10.0886	3	1.93432	285.857
2024-03-12 13:07:00	1710270444	284.44	837.298	33.5029	1.5873	-2.3149	0.393676	2.8111	145.503	2024-03-12 13:07:00	2.10765	40.596	-105.14	20240312_0000_007	2024-03-12 19:07:00	2024-03-12 23:01:00	03:53:59	4S-23	35.799	LP PRV	40.5956	-105.14	1550.9	2024-03-12 13:07:00	2024-03-12 17:01:00	45.3254	1	1.40895	1.40895	353.791	-2.62895	0.983303	-2.65825	0.00930056	2.83429	-0.00121927	0.565216	11017.7	0.579525	0.258879	165.97	173.791	7.82151	2.286	2.07866	4.33937	3	0.450821	284.403
2024-03-12 13:22:00	1710271344	284.341	837.085	33.6042	0.656298	-2.47439	0.638075	2.5615	165.465	2024-03-12 13:22:00	4.13816	40.596	-105.14	20240312_0000_007	2024-03-12 19:07:00	2024-03-12 23:01:00	03:53:59	4S-23	35.799	LP PRV	40.5956	-105.14	1550.9	2024-03-12 13:07:00	2024-03-12 17:01:00	45.3254	1	1.40895	1.40895	353.791	-2.55994	0.000155826	-2.62335	0.280191	2.62335	0.00160285	0.587588	-9414.7	0.679881	0.261942	164.842	173.791	8.94952	2.286	2.07866	4.93002	3	0.497066	284.327
2024-03-12 13:37:00	1710272244	284.341	836.894	33.1026	1.30665	-2.86103	0.646054	3.1459	155.498	2024-03-12 13:37:00	4.173	40.596	-105.14	20240312_0000_007	2024-03-12 19:07:00	2024-03-12 23:01:00	03:53:59	4S-23	35.799	LP PRV	40.5956	-105.14	1550.9	2024-03-12 13:07:00	2024-03-12 17:01:00	45.3254	1	1.40895	1.40895	353.791	-2.94874	1.09443	-3.01228	0.196506	3.20493	0.000953583	0.555736	-13390.8	0.657013	0.240265	175.684	173.791	1.89307	2.286	2.07866	3.42845	3	0.565678	284.368
2024-03-17 12:01:00	1710698466	278.74	847.947	56.4868	-0.00656147	-0.681243	0.247984	0.681725	180.5	2024-03-17 12:01:00	22.2418	40.596	-105.14	20240317_0000_005	2024-03-17 14:46:00	2024-03-17 18:50:00	04:04:46	4W-51	17.413	Flange - Casing	40.5959	-105.14	1548.6	2024-03-17 08:46:00	2024-03-17 12:50:00	11.3814	1	0.685326	0.685326	31.0064	-0.572558	0.369206	-0.613945	0.111311	0.716409	0.0016166	0.416326	-3244.97	0.270032	0.10859	212.302	211.006	1.29522	0.4572	1.99505	19.7139	3	1.0356	278.912
2024-03-18 03:46:00	1710755159	273.732	847.477	70.5124	-0.18811	0.0705725	0.253305	0.202665	289.994	2024-03-18 03:46:00	2.052	40.596	-105.14	20240318_0000_004	2024-03-18 09:01:00	2024-03-18 12:41:00	03:40:10	4S-42	13.476	House Regulator Plug	40.5957	-105.14	1549.67	2024-03-18 03:01:00	2024-03-18 06:41:00	38.1292	1	0.530377	0.530377	10.7379	0.200237	-0.0164614	-0.230564	0.226049	0.231151	0.0122216	0.315232	-182.837	0.216864	0.0393618	199.283	190.738	8.54558	1.143	2.00757	2.83913	3	2.04007	273.647
2024-03-18 10:26:00	1710779172	279.732	848.646	49.5463	-0.0722342	-0.947773	0.679317	0.952327	184.137	2024-03-18 10:26:00	2.72813	40.596	-105.14	20240318_0000_005	2024-03-18 14:41:00	2024-03-18 20:01:00	05:19:47	4W-32	86.725	Flange - Plunger Base	40.5959	-105.14	1549.1	2024-03-18 08:41:00	2024-03-18 14:01:00	9.96453	1	3.41325	3.41325	352.767	-0.893097	-0.325375	-1.04114	0.418474	1.0908	-0.00530838	0.497353	1690.05	0.448562	0.197598	165.628	172.767	7.13814	0.9652	2.23986	19.9026	3	1.23846	279.852
2024-03-18 13:41:00	1710790873	285.238	846.574	34.9047	0.81263	-0.815314	1.08638	1.22122	139.161	2024-03-18 13:41:00	31.0427	40.596	-105.14	20240318_0000_005	2024-03-18 14:41:00	2024-03-18 20:01:00	05:19:47	4W-32	86.725	Flange - Plunger Base	40.5959	-105.14	1549.1	2024-03-18 08:41:00	2024-03-18 14:01:00	9.96453	1	3.41325	3.41325	352.767	-1.012	0.548599	-1.14832	0.941135	1.27263	-0.00679662	0.630694	2745.69	0.825583	0.299319	164.913	172.767	7.85372	0.9652	2.23986	33.4213	3	0.563759	285.26
2024-03-20 07:47:00	1710942431	275.633	842.714	62.6822	0.809777	0.559369	0.256949	0.984191	55.3645	2024-03-20 07:47:00	2.19821	40.596	-105.14	20240320_0000_005	2024-03-20 12:47:00	2024-03-20 16:07:00	03:19:59	5S-32	46.499	Kimray (large) Vent	40.5959	-105.139	1548.4	2024-03-20 06:47:00	2024-03-20 10:07:00	76.0237	1	1.83007	1.83007	277.81	-0.620415	0.764014	-0.64576	0.184204	1.00036	-0.0197476	0.618934	866.213	0.881662	0.323108	102.428	97.8097	4.61863	1.0414	1.98938	3.05469	3	0.529164	276.326
2024-03-20 09:02:00	1710946931	279.037	843.655	50.5048	3.34626	-1.03233	0.508538	3.50609	107.004	2024-03-20 09:02:00	1.99574	40.596	-105.14	20240320_0000_005	2024-03-20 12:47:00	2024-03-20 16:07:00	03:19:59	5S-32	46.499	Kimray (large) Vent	40.5959	-105.139	1548.4	2024-03-20 06:47:00	2024-03-20 10:07:00	76.0237	1	1.83007	1.83007	277.81	-3.48142	-0.377957	-3.51573	0.136279	3.53598	-0.00106255	0.525049	9921.31	0.807641	0.286683	100.684	97.8097	2.87399	1.0414	1.98938	2.16785	3	0.281678	279.038
2024-03-20 09:17:00	1710947830	279.037	843.744	50.5921	2.34761	0.650459	0.208242	2.44222	74.928	2024-03-20 09:17:00	2.32999	40.596	-105.14	20240320_0000_005	2024-03-20 12:47:00	2024-03-20 16:07:00	03:19:59	5S-32	46.499	Kimray (large) Vent	40.5959	-105.139	1548.4	2024-03-20 06:47:00	2024-03-20 10:07:00	76.0237	1	1.83007	1.83007	277.81	-2.18342	1.0803	-2.19261	-0.0564213	2.44429	-0.00266316	0.568894	5035.88	0.624866	0.283133	102.444	97.8097	4.63455	1.0414	1.98938	2.46568	3	0.398425	279.077
2024-03-20 12:22:00	1710958933	282.435	842.273	45.5988	0.894458	2.2459	0.48449	2.41746	21.7221	2024-03-20 12:22:00	2.00973	40.596	-105.14	20240320_0000_006	2024-03-20 18:07:00	2024-03-20 23:20:00	05:13:00	5W-32	9.374	Valve	40.5957	-105.139	1548.8	2024-03-20 12:07:00	2024-03-20 17:20:00	89.6155	1	0.368934	0.368934	296.299	-0.137395	2.41356	-0.224525	0.450773	2.42398	-0.00339416	0.692366	7213.57	1.42753	0.291097	113.682	116.299	2.61748	1.2446	2.00591	2.02071	3	0.80924	282.48
2024-03-20 12:52:00	1710960732	282.838	841.779	44.5009	2.92259	0.810134	-0.130814	3.03426	74.4808	2024-03-20 12:52:00	2.01882	40.596	-105.14	20240320_0000_006	2024-03-20 18:07:00	2024-03-20 23:20:00	05:13:00	5W-32	9.374	Valve	40.5957	-105.139	1548.8	2024-03-20 12:07:00	2024-03-20 17:20:00	89.6155	1	0.368934	0.368934	296.299	-2.44259	1.79766	-2.33716	-0.721825	2.94854	-0.0359746	0.722152	774.375	1.05328	0.295864	117.306	116.299	1.00642	1.2446	2.00591	2.01932	3	1.10674	283.204
[truncated: 30 more columns]

## Sheet: L
Time	timestamp	AT	BP	RH	U	V	W	WS	WD	Time_MGGA_second_avg	x_CH4__ppm	MGGA_lat_N	MGGA_long_W	EventID	UTCStart	UTCEnd	Duration_HMS	EmissionPoint	C1FlowAvg_slpm	Description	Lat	Lon	Alt	MTStart	MTEnd	Distance_meters	CountUniquePoints	Actual_Emission_kg_h	TotalEmissions	bearing	V1	U1	V2	W1	WS_rotated	wTp	Uast	L	sigma_y	sigma_z	avg_WD	downwind	diff	hs	Cb	mean_CH4_ppm	z	z0	meanAT
2024-02-13 10:15:00	1707844510	277.737	841.288	44.5977	1.61913	-0.272489	0.747966	1.64424	99.3451	2024-02-13 10:15:00	3.1836	40.596	-105.14	20240213_0000_007	2024-02-13 17:00:00	2024-02-13 19:00:00	01:59:59	4T-12	67.102	Thief Hatch	40.5958	-105.14	1552.6	2024-02-13 10:00:00	2024-02-13 12:00:00	46.5081	1	2.64094	2.64094	310.548	-1.43695	0.794347	-1.51495	0.573778	1.71057	0.00401009	0.602905	-3967.79	1.02895	0.29844	129.054	130.548	1.49411	4.572	2.09009	3.04429	3	0.280704	277.935
2024-02-13 11:00:00	1707847211	277.943	841.321	41.6551	3.19105	-2.54413	0.0866926	4.08508	128.657	2024-02-13 11:00:00	6.42767	40.596	-105.14	20240213_0000_007	2024-02-13 17:00:00	2024-02-13 19:00:00	01:59:59	4T-12	67.102	Thief Hatch	40.5958	-105.14	1552.6	2024-02-13 10:00:00	2024-02-13 12:00:00	46.5081	1	2.64094	2.64094	310.548	-4.0786	-0.143073	-4.06164	-0.381511	4.06416	0.00189963	0.618549	-9046.79	0.890296	0.321797	126.946	130.548	3.60143	4.572	2.09009	3.97083	3	0.395957	277.99
2024-02-13 11:15:00	1707848111	278.139	841.153	41.3956	2.24091	-2.44422	0.272063	3.31775	137.554	2024-02-13 11:15:00	3.06104	40.596	-105.14	20240213_0000_007	2024-02-13 17:00:00	2024-02-13 19:00:00	01:59:59	4T-12	67.102	Thief Hatch	40.5958	-105.14	1552.6	2024-02-13 10:00:00	2024-02-13 12:00:00	46.5081	1	2.64094	2.64094	310.548	-3.3153	0.0684753	-3.32043	-0.19989	3.32114	-0.00645401	0.572507	2114.67	0.869971	0.275331	138.43	130.548	7.88279	4.572	2.09009	3.10287	3	0.442707	278.413
2024-02-15 07:00:00	1708005624	269.941	841.622	90.5686	0.424906	-0.676808	0.207597	0.808437	147.425	2024-02-15 07:00:00	2.35306	40.596	-105.14	20240215_0000_002	2024-02-15 11:00:00	2024-02-15 15:00:00	03:59:59	4T-31	33.256	Header	40.5958	-105.14	1553.2	2024-02-15 04:00:00	2024-02-15 08:00:00	47.857	1	1.30886	1.30886	298.556	-0.636258	-0.483518	-0.667892	0.0429034	0.824542	-0.000712341	0.410045	6824.37	0.380261	0.102595	111.865	118.556	6.69083	4.9276	2.06483	3.07817	3	0.982543	269.945
2024-02-17 09:30:00	1708187437	266.936	849.385	61.7801	-0.0972851	0.263648	0.360186	0.281456	339.81	2024-02-17 09:30:00	2.0343	40.596	-105.14	20240217_0000_004	2024-02-17 16:00:00	2024-02-17 20:00:00	03:59:59	5S-27	45.407	Kimray Packing	40.5959	-105.139	1548.3	2024-02-17 09:00:00	2024-02-17 13:00:00	80.2041	1	1.78709	1.78709	278.871	0.189992	0.207069	-0.293404	0.282392	0.359115	-0.115835	0.365114	29.3235	0.19487	0.112978	97.069	98.8712	1.80223	1.2192	2.031	2.03516	3	2.18684	267.879
2024-02-18 18:15:00	1708305346	276.136	836.131	52.4533	-0.754041	-0.36188	0.233699	0.836384	244.351	2024-02-18 18:15:00	2.59248	40.596	-105.14	20240219_0000_000	2024-02-19	2024-02-19 02:00:00	01:59:58	4S-21	19.211	Kimray valve packing	40.5957	-105.14	1549.1	2024-02-18 17:00:00	2024-02-18 19:00:00	41.5494	1	0.75609	0.75609	353.459	0.337575	-0.765231	0.343862	-0.224345	0.838939	0.1973	1.18825	-614.202	2.13086	0.143268	174.738	173.459	1.27925	1.143	2.21992	3.78377	3	1.62303	276.019
2024-02-24 05:08:00	1708776525	268.836	841.7	55.6761	0.571093	0.657485	0.246411	0.870881	40.9777	2024-02-24 05:08:00	2.10247	40.596	-105.14	20240224_0000_009	2024-02-24 12:08:00	2024-02-24 14:08:00	01:59:59	4S-22	19.849	Kimray Flange Diaphragm	40.5957	-105.14	1549.2	2024-02-24 05:08:00	2024-02-24 07:08:00	41.8099	1	0.7812	0.7812	353.034	0.861553	0.127125	0.624793	0.642358	0.637595	0.140774	0.821323	-275.886	0.715648	0.0999016	181.062	173.034	8.02846	1.143	2.10249	2.2837	3	1.75439	268.382
2024-03-01 10:30:00	1709314231	287.74	836.546	21.7052	2.99005	-2.25186	0.496715	3.75392	126.799	2024-03-01 10:30:00	12.6651	40.596	-105.14	20240301_0000_011	2024-03-01 17:00:00	2024-03-01 22:00:00	04:59:59	4W-22	76.44	Threaded Connection - Pressure Transducer	40.596	-105.14	1548.2	2024-03-01 10:00:00	2024-03-01 15:00:00	10.5212	1	3.00846	3.00846	331.395	-3.35739	1.65505	-3.38833	0.195116	3.77093	-0.0111104	0.744117	2796.2	1.37148	0.430755	153.236	151.395	1.84083	1.4478	2.02018	10.239	3	0.133036	288.17
2024-03-01 10:45:00	1709315130	288.338	836.398	21.2552	4.17904	-4.33136	0.101895	6.0203	136.24	2024-03-01 10:45:00	9.05992	40.596	-105.14	20240301_0000_011	2024-03-01 17:00:00	2024-03-01 22:00:00	04:59:59	4W-22	76.44	Threaded Connection - Pressure Transducer	40.596	-105.14	1548.2	2024-03-01 10:00:00	2024-03-01 15:00:00	10.5212	1	3.00846	3.00846	331.395	-5.68581	1.974	-5.66993	-0.436665	6.00373	-0.00349078	0.735233	8606.02	1.13496	0.382804	155.512	151.395	4.11747	1.4478	2.02018	11.2604	3	0.166712	288.875
2024-03-01 11:00:00	1709316031	289.04	836.359	20.0089	-0.42138	-4.78883	-0.0221275	4.8086	185.05	2024-03-01 11:00:00	16.9775	40.596	-105.14	20240301_0000_011	2024-03-01 17:00:00	2024-03-01 22:00:00	04:59:59	4W-22	76.44	Threaded Connection - Pressure Transducer	40.596	-105.14	1548.2	2024-03-01 10:00:00	2024-03-01 15:00:00	10.5212	1	3.00846	3.00846	331.395	-3.84749	-2.88223	-3.83224	-0.343019	4.79513	-0.00145536	0.72717	19976.3	1.20222	0.409035	148.667	151.395	2.7275	1.4478	2.02018	15.1217	3	0.150161	288.961
2024-03-01 11:15:00	1709316930	288.74	836.41	20.3111	2.42107	-2.57743	0.715403	3.538	136.968	2024-03-01 11:15:00	11.6978	40.596	-105.14	20240301_0000_011	2024-03-01 17:00:00	2024-03-01 22:00:00	04:59:59	4W-22	76.44	Threaded Connection - Pressure Transducer	40.596	-105.14	1548.2	2024-03-01 10:00:00	2024-03-01 15:00:00	10.5212	1	3.00846	3.00846	331.395	-3.41807	0.906356	-3.46607	0.425922	3.58261	-0.00435409	0.672598	5281.27	1.11074	0.39107	151.849	151.395	0.454173	1.4478	2.02018	11.6433	3	0.104016	288.822
2024-03-01 13:45:00	1709325930	289.543	835.221	18.4105	2.97784	-1.11104	0.162378	3.20714	110.068	2024-03-01 13:45:00	5.11286	40.596	-105.14	20240301_0000_011	2024-03-01 17:00:00	2024-03-01 22:00:00	04:59:59	4W-22	76.44	Threaded Connection - Pressure Transducer	40.596	-105.14	1548.2	2024-03-01 10:00:00	2024-03-01 15:00:00	10.5212	1	3.00846	3.00846	331.395	-2.35838	2.13072	-2.36174	-0.102493	3.18084	-0.00489335	0.680827	4893.49	1.14633	0.360643	152.387	151.395	0.992122	1.4478	2.02018	11.359	3	0.287127	289.86
2024-03-01 14:15:00	1709327731	289.942	834.934	18.01	-2.2556	-2.4737	0.0720459	3.34818	222.394	2024-03-01 14:15:00	4.54035	40.596	-105.14	20240301_0000_011	2024-03-01 17:00:00	2024-03-01 22:00:00	04:59:59	4W-22	76.44	Threaded Connection - Pressure Transducer	40.596	-105.14	1548.2	2024-03-01 10:00:00	2024-03-01 15:00:00	10.5212	1	3.00846	3.00846	331.395	-0.457622	-3.31625	-0.463217	0.00620849	3.34844	-0.00618095	0.791826	6098.83	1.21026	0.334179	142.205	151.395	9.18997	1.4478	2.02018	8.13893	3	0.570479	290.041
2024-03-06 14:15:00	1709759712	285.743	833.48	26.5843	-0.346657	-0.819845	0.245793	0.890122	202.92	2024-03-06 14:15:00	2.19783	40.596	-105.14	20240306_0000_008	2024-03-06 19:00:00	2024-03-06 22:00:00	03:00:00	4W-32	83.42	Flange - Plunger Base	40.5959	-105.14	1549.1	2024-03-06 12:00:00	2024-03-06 15:00:00	9.96453	1	3.28317	3.28317	352.767	0.262438	-0.850554	0.340686	-0.114983	0.916248	-0.0253234	0.747401	1234.41	0.742369	0.161382	171.03	172.767	1.73611	0.9652	2.07032	10.0886	3	1.93432	285.857
2024-03-12 13:07:00	1710270444	284.44	837.298	33.5029	1.5873	-2.3149	0.393676	2.8111	145.503	2024-03-12 13:07:00	2.10765	40.596	-105.14	20240312_0000_007	2024-03-12 19:07:00	2024-03-12 23:01:00	03:53:59	4S-23	35.799	LP PRV	40.5956	-105.14	1550.9	2024-03-12 13:07:00	2024-03-12 17:01:00	45.3254	1	1.40895	1.40895	353.791	-2.62895	0.983303	-2.65825	0.00930056	2.83429	-0.00121927	0.565216	11017.7	0.579525	0.258879	165.97	173.791	7.82151	2.286	2.07866	4.33937	3	0.450821	284.403
2024-03-12 13:22:00	1710271344	284.341	837.085	33.6042	0.656298	-2.47439	0.638075	2.5615	165.465	2024-03-12 13:22:00	4.13816	40.596	-105.14	20240312_0000_007	2024-03-12 19:07:00	2024-03-12 23:01:00	03:53:59	4S-23	35.799	LP PRV	40.5956	-105.14	1550.9	2024-03-12 13:07:00	2024-03-12 17:01:00	45.3254	1	1.40895	1.40895	353.791	-2.55994	0.000155826	-2.62335	0.280191	2.62335	0.00160285	0.587588	-9414.7	0.679881	0.261942	164.842	173.791	8.94952	2.286	2.07866	4.93002	3	0.497066	284.327
2024-03-12 13:37:00	1710272244	284.341	836.894	33.1026	1.30665	-2.86103	0.646054	3.1459	155.498	2024-03-12 13:37:00	4.173	40.596	-105.14	20240312_0000_007	2024-03-12 19:07:00	2024-03-12 23:01:00	03:53:59	4S-23	35.799	LP PRV	40.5956	-105.14	1550.9	2024-03-12 13:07:00	2024-03-12 17:01:00	45.3254	1	1.40895	1.40895	353.791	-2.94874	1.09443	-3.01228	0.196506	3.20493	0.000953583	0.555736	-13390.8	0.657013	0.240265	175.684	173.791	1.89307	2.286	2.07866	3.42845	3	0.565678	284.368
2024-03-17 12:01:00	1710698466	278.74	847.947	56.4868	-0.00656147	-0.681243	0.247984	0.681725	180.5	2024-03-17 12:01:00	22.2418	40.596	-105.14	20240317_0000_005	2024-03-17 14:46:00	2024-03-17 18:50:00	04:04:46	4W-51	17.413	Flange - Casing	40.5959	-105.14	1548.6	2024-03-17 08:46:00	2024-03-17 12:50:00	11.3814	1	0.685326	0.685326	31.0064	-0.572558	0.369206	-0.613945	0.111311	0.716409	0.0016166	0.416326	-3244.97	0.270032	0.10859	212.302	211.006	1.29522	0.4572	1.99505	19.7139	3	1.0356	278.912
2024-03-18 03:46:00	1710755159	273.732	847.477	70.5124	-0.18811	0.0705725	0.253305	0.202665	289.994	2024-03-18 03:46:00	2.052	40.596	-105.14	20240318_0000_004	2024-03-18 09:01:00	2024-03-18 12:41:00	03:40:10	4S-42	13.476	House Regulator Plug	40.5957	-105.14	1549.67	2024-03-18 03:01:00	2024-03-18 06:41:00	38.1292	1	0.530377	0.530377	10.7379	0.200237	-0.0164614	-0.230564	0.226049	0.231151	0.0122216	0.315232	-182.837	0.216864	0.0393618	199.283	190.738	8.54558	1.143	2.00757	2.83913	3	2.04007	273.647
2024-03-18 10:26:00	1710779172	279.732	848.646	49.5463	-0.0722342	-0.947773	0.679317	0.952327	184.137	2024-03-18 10:26:00	2.72813	40.596	-105.14	20240318_0000_005	2024-03-18 14:41:00	2024-03-18 20:01:00	05:19:47	4W-32	86.725	Flange - Plunger Base	40.5959	-105.14	1549.1	2024-03-18 08:41:00	2024-03-18 14:01:00	9.96453	1	3.41325	3.41325	352.767	-0.893097	-0.325375	-1.04114	0.418474	1.0908	-0.00530838	0.497353	1690.05	0.448562	0.197598	165.628	172.767	7.13814	0.9652	2.23986	19.9026	3	1.23846	279.852
2024-03-18 13:41:00	1710790873	285.238	846.574	34.9047	0.81263	-0.815314	1.08638	1.22122	139.161	2024-03-18 13:41:00	31.0427	40.596	-105.14	20240318_0000_005	2024-03-18 14:41:00	2024-03-18 20:01:00	05:19:47	4W-32	86.725	Flange - Plunger Base	40.5959	-105.14	1549.1	2024-03-18 08:41:00	2024-03-18 14:01:00	9.96453	1	3.41325	3.41325	352.767	-1.012	0.548599	-1.14832	0.941135	1.27263	-0.00679662	0.630694	2745.69	0.825583	0.299319	164.913	172.767	7.85372	0.9652	2.23986	33.4213	3	0.563759	285.26
2024-03-20 07:47:00	1710942431	275.633	842.714	62.6822	0.809777	0.559369	0.256949	0.984191	55.3645	2024-03-20 07:47:00	2.19821	40.596	-105.14	20240320_0000_005	2024-03-20 12:47:00	2024-03-20 16:07:00	03:19:59	5S-32	46.499	Kimray (large) Vent	40.5959	-105.139	1548.4	2024-03-20 06:47:00	2024-03-20 10:07:00	76.0237	1	1.83007	1.83007	277.81	-0.620415	0.764014	-0.64576	0.184204	1.00036	-0.0197476	0.618934	866.213	0.881662	0.323108	102.428	97.8097	4.61863	1.0414	1.98938	3.05469	3	0.529164	276.326
2024-03-20 09:02:00	1710946931	279.037	843.655	50.5048	3.34626	-1.03233	0.508538	3.50609	107.004	2024-03-20 09:02:00	1.99574	40.596	-105.14	20240320_0000_005	2024-03-20 12:47:00	2024-03-20 16:07:00	03:19:59	5S-32	46.499	Kimray (large) Vent	40.5959	-105.139	1548.4	2024-03-20 06:47:00	2024-03-20 10:07:00	76.0237	1	1.83007	1.83007	277.81	-3.48142	-0.377957	-3.51573	0.136279	3.53598	-0.00106255	0.525049	9921.31	0.807641	0.286683	100.684	97.8097	2.87399	1.0414	1.98938	2.16785	3	0.281678	279.038
2024-03-20 09:17:00	1710947830	279.037	843.744	50.5921	2.34761	0.650459	0.208242	2.44222	74.928	2024-03-20 09:17:00	2.32999	40.596	-105.14	20240320_0000_005	2024-03-20 12:47:00	2024-03-20 16:07:00	03:19:59	5S-32	46.499	Kimray (large) Vent	40.5959	-105.139	1548.4	2024-03-20 06:47:00	2024-03-20 10:07:00	76.0237	1	1.83007	1.83007	277.81	-2.18342	1.0803	-2.19261	-0.0564213	2.44429	-0.00266316	0.568894	5035.88	0.624866	0.283133	102.444	97.8097	4.63455	1.0414	1.98938	2.46568	3	0.398425	279.077
2024-03-20 12:22:00	1710958933	282.435	842.273	45.5988	0.894458	2.2459	0.48449	2.41746	21.7221	2024-03-20 12:22:00	2.00973	40.596	-105.14	20240320_0000_006	2024-03-20 18:07:00	2024-03-20 23:20:00	05:13:00	5W-32	9.374	Valve	40.5957	-105.139	1548.8	2024-03-20 12:07:00	2024-03-20 17:20:00	89.6155	1	0.368934	0.368934	296.299	-0.137395	2.41356	-0.224525	0.450773	2.42398	-0.00339416	0.692366	7213.57	1.42753	0.291097	113.682	116.299	2.61748	1.2446	2.00591	2.02071	3	0.80924	282.48
2024-03-20 12:52:00	1710960732	282.838	841.779	44.5009	2.92259	0.810134	-0.130814	3.03426	74.4808	2024-03-20 12:52:00	2.01882	40.596	-105.14	20240320_0000_006	2024-03-20 18:07:00	2024-03-20 23:20:00	05:13:00	5W-32	9.374	Valve	40.5957	-105.139	1548.8	2024-03-20 12:07:00	2024-03-20 17:20:00	89.6155	1	0.368934	0.368934	296.299	-2.44259	1.79766	-2.33716	-0.721825	2.94854	-0.0359746	0.722152	774.375	1.05328	0.295864	117.306	116.299	1.00642	1.2446	2.00591	2.01932	3	1.10674	283.204
2024-03-20 13:37:00	1710963433	284.441	841.091	42.8269	2.84554	-0.352327	0.0908611	2.87203	96.8967	2024-03-20 13:37:00	2.0467	40.596	-105.14	20240320_0000_006	2024-03-20 18:07:00	2024-03-20 23:20:00	05:13:00	5W-32	9.374	Valve	40.5957	-105.139	1548.8	2024-03-20 12:07:00	2024-03-20 17:20:00	89.6155	1	0.368934	0.368934	296.299	-2.81775	0.530595	-2.78669	-0.427016	2.83675	0.0203023	0.657314	-1039.97	1.09676	0.32345	108.339	116.299	7.95972	1.2446	2.00591	2.0407	3	0.730268	284.57
[truncated: 22 more columns]
