# Supplementary material for: Evaluating the feasibility of using downwind methods to quantify point source oil and gas emissions using continuously monitoring fence-line sensors
Source: Copernicus journal article supplement (doi:10.5194/amt-18-5687-2025), 2025-10-22
Supplement: Supplementary file [file amt-18-5687-2025-supplement-title-page.pdf › amt-18-5687-2025-supplement-title-page.pdf]

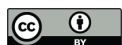

## *Supplement of*

# **Evaluating the feasibility of using downwind methods to quantify point source oil and gas emissions using continuously monitoring fence-line sensors**

**Mercy Mbua et al.**

*Correspondence to:* Mercy Mbua ([mercy.mbua@colostate.edu](mailto:mercy.mbua@colostate.edu))

- [amt-18-5687-2025-supplement-title-page.pdf](#)
- Supplementary Information
  - MATLAB Code & Software Configuration
    - \* EC
    - \* GPIM\_bLs
    - \* Validation.xlsx
  - Unmarked\_Supplementary Material.pdf

The copyright of individual parts of the supplement might differ from the article licence.
